# Supplementary material for: MET gene alterations predict poor survival following chemotherapy in patients with advanced cancer
Source: PubMed Central journal article supplement (PMC9722768; doi:10.3389/pore.2022.1610697), 2022-11-22

Supplementary Figure

Supplementary Figure 1. Immunohistochemical images of representative MET overexpression cases.

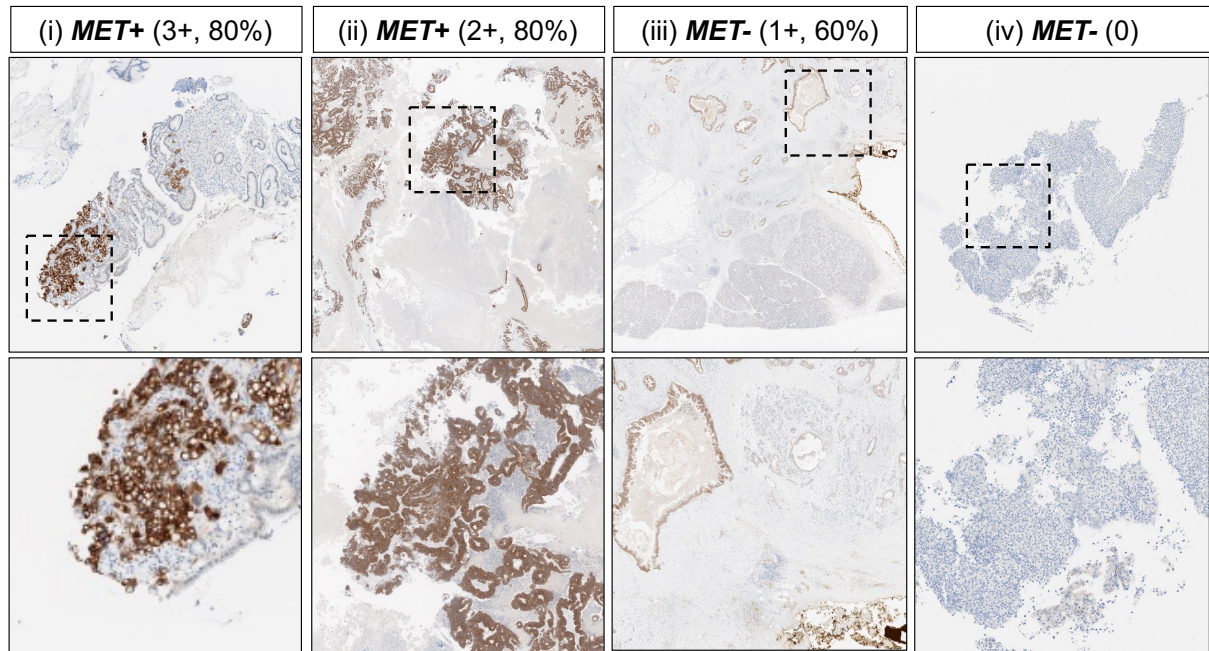

Supplement: Image1.pdf [file Image1.pdf]
